# Supplementary material for: Design and synthesis of a DNA intercalative half-sandwich organoruthenium(ii)–chromone complex: cytotoxicity evaluation and topoisomerase Iα inhibition assay
Source: Royal Society of Chemistry journal article supplement (doi:10.1039/c9nj00042a), 2019-01-01
Supplement: c9nj00042a1.pdf [file c9nj00042a1.pdf]

## Supplementary Data

### Design and synthesis of a DNA intercalative half-Sandwich organoruthenium(II)–chromone complex: Cytotoxicity evaluation and topoisomerase I $\alpha$ inhibition assay

Imtiyaz Yousuf\*<sup>a</sup>, Farukh Arjmand<sup>a</sup>, Sartaj Tabassum<sup>a</sup> and Musheer Ahmad<sup>b</sup>

\*Corresponding author *E-mail address*: imtiyazchem@gmail.com. (I. Yousuf)

<sup>a</sup>*Department of Chemistry, Aligarh Muslim University, Aligarh 202002, Uttar Pradesh, India.*

<sup>b</sup>*Department of Applied Chemistry, Aligarh Muslim University, Aligarh 202002, Uttar Pradesh, India.*

**Table S1.** Selected bond lengths and bond angles in complex **1**

#### Bond Lengths

| Atom | Atom | Length/Å  |
|------|------|-----------|
| Ru2  | Cl2  | 2.4356(7) |
| Ru2  | O6   | 2.072(3)  |
| Ru2  | O5   | 2.079(2)  |
| Ru2  | C34  | 2.199(4)  |
| Ru2  | C37  | 2.215(3)  |
| Ru2  | C38  | 2.174(3)  |
| Ru2  | C35  | 2.162(3)  |
| Ru2  | C39  | 2.161(4)  |
| Ru2  | C36  | 2.174(3)  |
| Ru1  | Cl1  | 2.4342(7) |
| Ru1  | O1   | 2.080(2)  |
| Ru1  | O2   | 2.070(3)  |

#### Bond Angles

| Atom | Atom | Atom | Angle/°    |
|------|------|------|------------|
| O6   | Ru2  | Cl2  | 82.88(7)   |
| O5   | Ru2  | Cl2  | 85.21(6)   |
| O5   | Ru2  | O6   | 88.28(9)   |
| C34  | Ru2  | Cl2  | 116.42(9)  |
| C34  | Ru2  | O6   | 160.49(11) |
| C34  | Ru2  | O5   | 90.46(12)  |
| C37  | Ru2  | Cl2  | 120.50(9)  |
| C37  | Ru2  | O6   | 91.08(12)  |
| C37  | Ru2  | O5   | 154.00(10) |
| C37  | Ru2  | C34  | 81.62(14)  |
| C38  | Ru2  | Cl2  | 93.88(8)   |
| C38  | Ru2  | O6   | 115.08(11) |
| C38  | Ru2  | O5   | 156.38(12) |
| C38  | Ru2  | C34  | 68.78(14)  |
| C38  | Ru2  | C37  | 37.35(13)  |

|     |     |     |            |
|-----|-----|-----|------------|
| C35 | Ru2 | Cl2 | 154.55(10) |
| C35 | Ru2 | O6  | 121.94(12) |
| C35 | Ru2 | O5  | 89.70(12)  |
| C35 | Ru2 | C34 | 38.56(14)  |
| C35 | Ru2 | C37 | 68.73(13)  |
| C35 | Ru2 | C38 | 81.02(13)  |
| C39 | Ru2 | Cl2 | 92.38(9)   |
| C39 | Ru2 | O6  | 153.01(13) |
| C39 | Ru2 | O5  | 117.90(12) |
| C39 | Ru2 | C34 | 37.26(14)  |
| C39 | Ru2 | C37 | 68.45(14)  |
| C39 | Ru2 | C38 | 38.49(14)  |

**Table S2.** IC<sub>50</sub> (μM) values of the complexes **1** on topoisomerase I activities of some of the classical Topo-I inhibitors.

| Drug/complex                                 | Inhibitory activity on Topo I (IC <sub>50</sub> ) (μM) |
|----------------------------------------------|--------------------------------------------------------|
| Camptothecin                                 | 17                                                     |
| Topostatin                                   | 17                                                     |
| Etoposide                                    | >1000                                                  |
| Hoechst 33258                                | 30                                                     |
| Novobiocin                                   | >100                                                   |
| Δ-[Ru(bpy) <sub>2</sub> (uip)] <sup>2+</sup> | ~ 40                                                   |
| Λ-[Ru(bpy) <sub>2</sub> (uip)] <sup>2+</sup> | ~ 40                                                   |
| <b>Complex 1</b>                             | <b>20</b>                                              |

**Table S3.** Summary of the screening data for *in vitro* antitumor activity of complex **1** (in μg/mL).

| Cell line              |                  | A-498 | Hep-G2 | MIA-PA-CA-2 | HeLA  | MCF7 |
|------------------------|------------------|-------|--------|-------------|-------|------|
| <b>GI<sub>50</sub></b> | <b>Complex 1</b> | >80   | >80    | 47.11       | 13.94 | >80  |
|                        | <b>ADR</b>       | <10   | <10    | <10         | <10   | <10  |
| <b>TGI</b>             | <b>Complex 1</b> | NE    | >80    | 22.4        | 64.39 | NE   |
|                        | <b>ADR</b>       | <10   | <10    | <10         | <10   | <10  |

**GI<sub>50</sub>** = growth inhibition of 50% (GI<sub>50</sub>) calculated from  $[(Ti-Tz)/(C-Tz)] \times 100 = 50$ , drug concentration that results in a 50% reduction in the net protein increase.

**ADR** = Adriamycin (taken as positive control compound).

**TGI** = tumor growth inhibition.

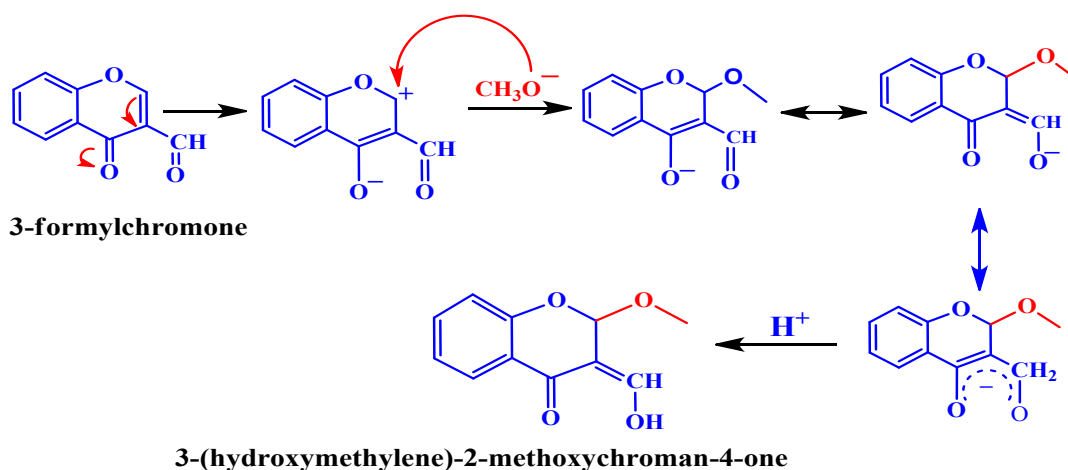

**Scheme S1:** Mechanistic route for *in situ* methoxylation of 3-formylchromone ligand.

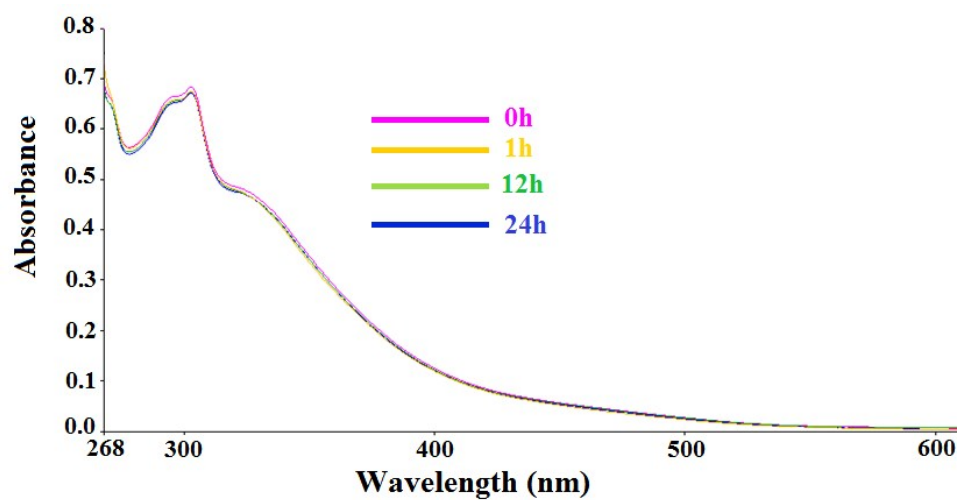

**Fig. S1** UV-vis absorption spectra of complex **1** in Tris buffer at pH 7.4 and 310 K (physiological conditions) as a function of different time intervals (0h, 6h, 12h, & 24h).

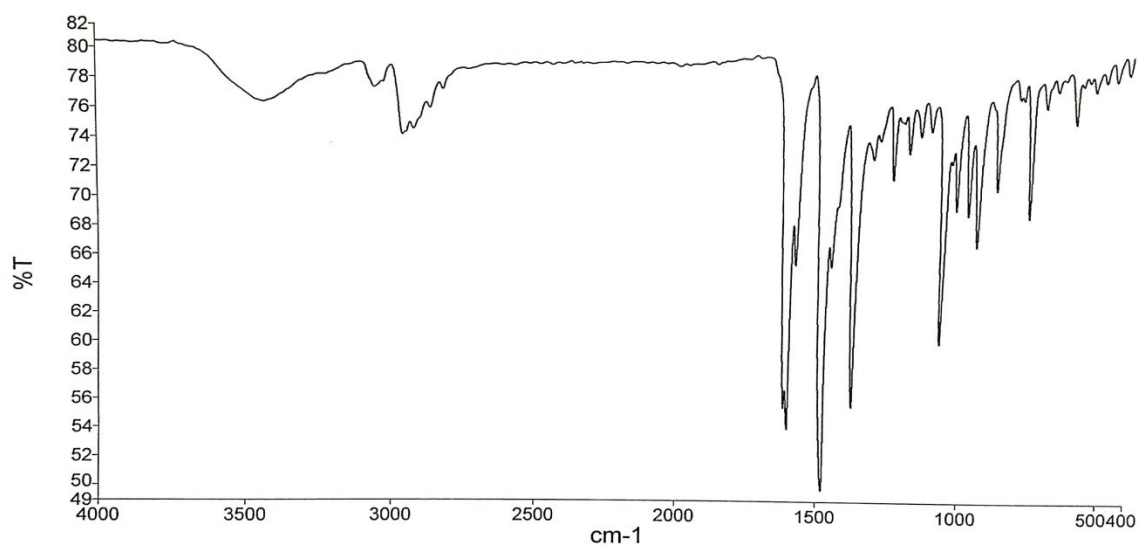

**Fig. S2** FTIR spectrum of complex **1**.

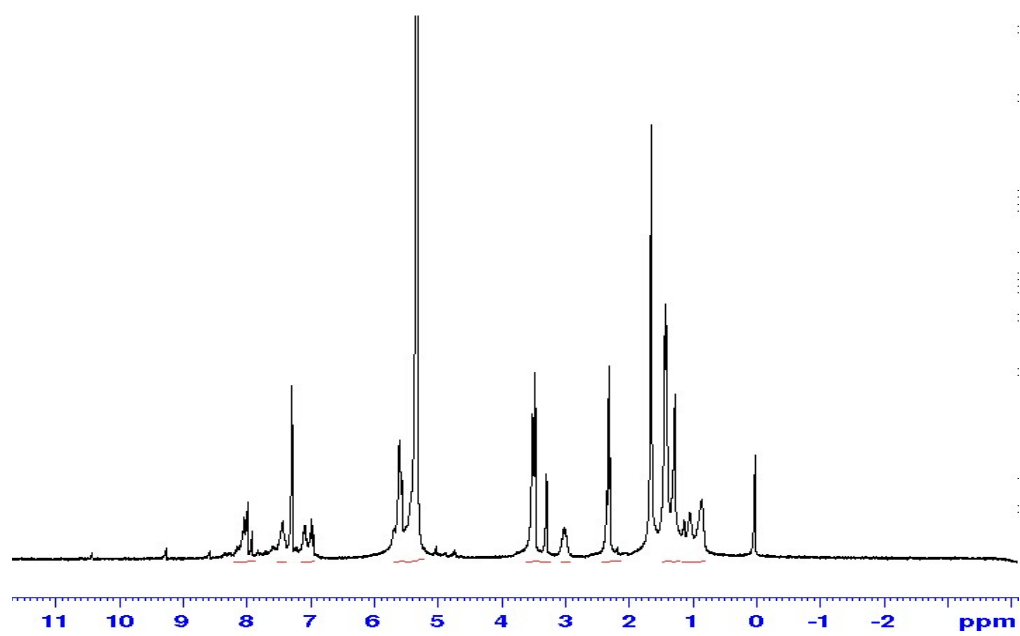

**Fig. S3.** <sup>1</sup>H NMR spectrum of complex **1**.

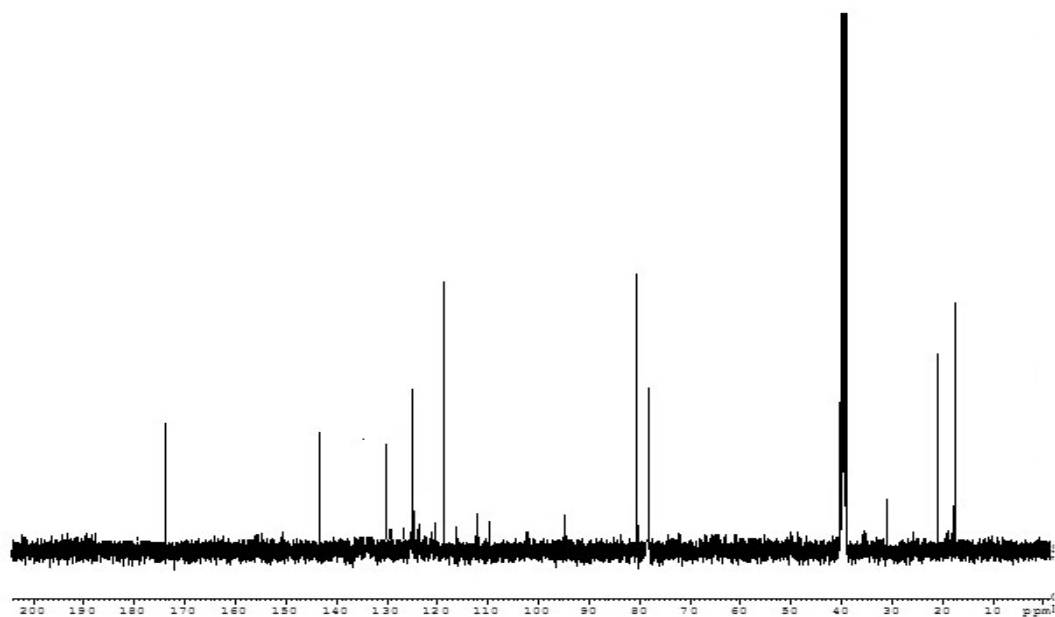

**Fig. S4**  $^{13}\text{C}$  NMR spectrum of complex 1.

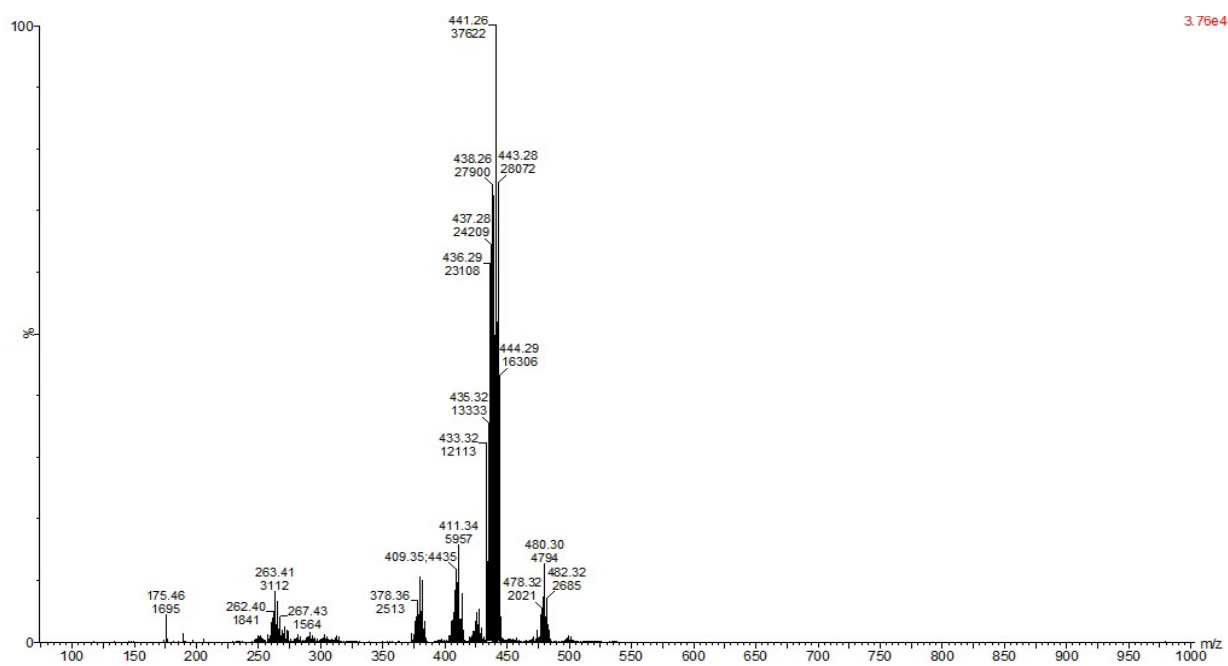

**Fig. S5** ESI MS spectrum of complex 1.

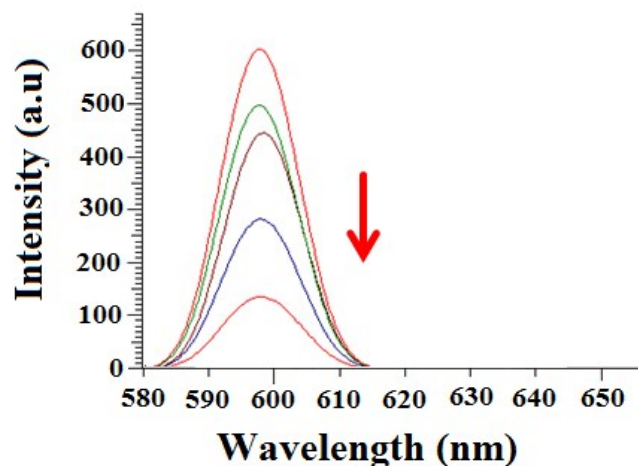

**Fig. S6.** Effect of increasing concentration of complex **1** on the emission spectra of EB–DNA system in Tris–HCl buffer at pH 7.2. [EB] = [DNA] =  $1 \times 10^{-5}$  M, [complex **1**] =  $1 \times 10^{-5}$  M Arrow shows change in intensity with increasing concentration of complex **1**.

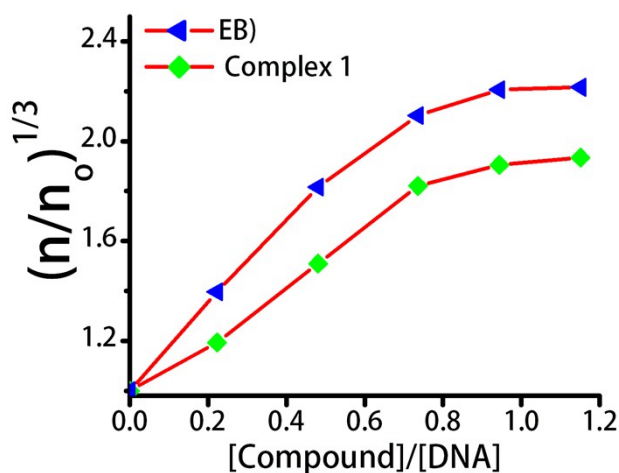

**Fig. S7** The effect of increasing concentration of EB and complex **1**, on the relative viscosity of ct–DNA at 37.0 C in 5 mM Tris–HCl buffer at pH = 7.2. ( $\eta$  and  $\eta_0$  are the specific viscosity of DNA in the presence and absence of the complex, respectively). [DNA] = 5.60  $\mu$ M and the molar ratios of complex **1** or EB to DNA were varied from 0.2 to 1.0.

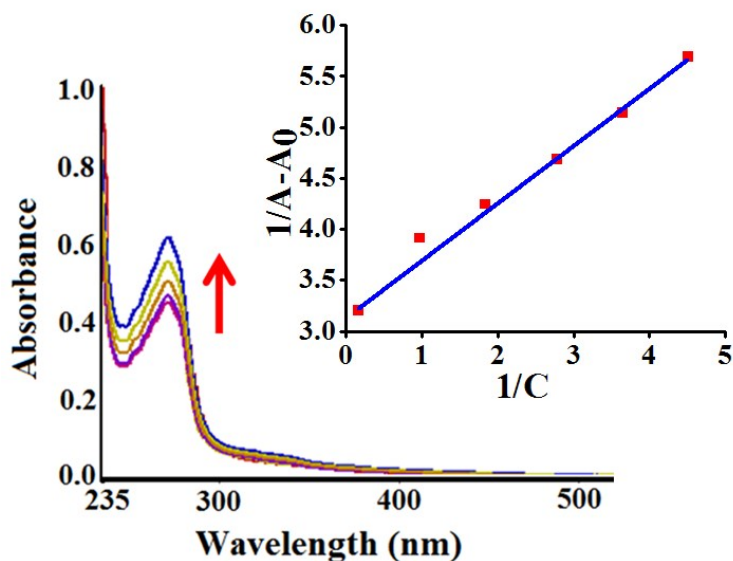

**Fig. S8.** UV-vis absorption spectra of HSA in presence of increasing concentration of complex **1** in 5 mM Tris-HCl/50 mM NaCl buffer at pH 7.4; [Complex **1**] =  $1.50 \times 10^{-5}$  M; [HSA] =  $1.00 \times 10^{-5}$  M. Inset: Plot of  $1/A-A_0$  vs  $1/[\text{Complex } \mathbf{1}]$ . Arrows indicate changes in absorbance upon increasing concentration of the complex **1**.

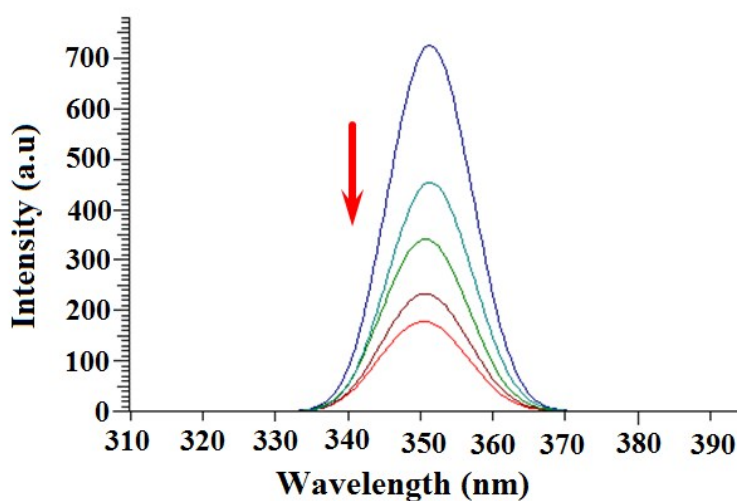

**Fig S9.** The fluorescence quenching spectra of HSA (Trp-214) upon titrating with different concentrations of complex **1** in 5 mM Tris-HCl/50 mM NaCl buffer, pH 7.4, at room temperature. [HSA] =  $1.25 \times 10^{-5}$  M, [Complex **1**] =  $0.0-0.8 \times 10^{-4}$  M. Arrow indicates intensity changes upon increasing concentration of the quencher (complex **1**).
